# Supplementary material for: Three-Dimensional Coculture Model to Analyze the Cross Talk Between Endothelial and Smooth Muscle Cells
Source: PubMed Central journal article supplement — Tissue Eng Part C Methods. 2017 Jan 1;23(1):38–49. doi: 10.1089/ten.tec.2016.0299 (PMC5240006; doi:10.1089/ten.tec.2016.0299), 2017-01-01
Supplement: Supp_Fig1.pdf [file Supp_Fig1.pdf]

## Supplementary Data

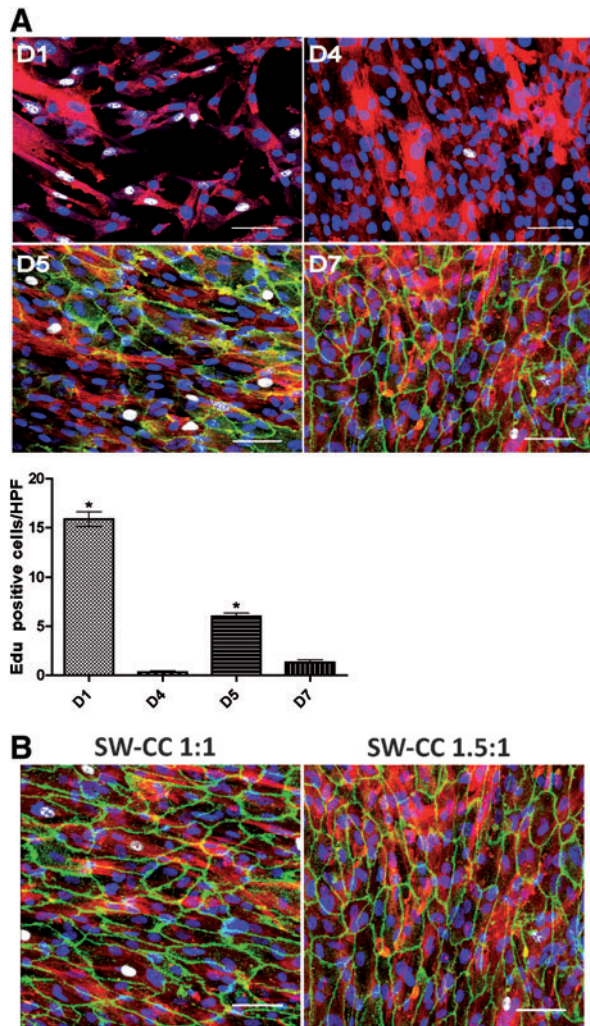

**SUPPLEMENTARY FIG. S1.** (A) Edu cell proliferation assay of SW-CC between days 1 and 7. Edu cell proliferation assays (C10337; ThermoFisher) were performed on days 1, 4, 5, and 7, according to the manufacturer's instructions. Nuclei of proliferating cells appeared *white*, SMC stained for  $\alpha$ -smooth muscle actin were *red*, and EC stained for VE-cadherin were *green*. Four fields/sample were randomly chosen, and proliferating cells were counted. On day 1, there were significantly higher numbers of proliferating SMC as evidenced by Edu / Incorporation. Proliferating cells were nearly absent on day 4, indicating the quiescence of SMC. Following addition of EC on day 5, the proliferating cell number increased significantly, which again lowered on day 7 of the SW-CC. Scale bar = 50  $\mu$ m. Bar graphs display mean  $\pm$  SD,  $n = 4$ ,  $*p < 0.05$ , one way ANOVA with Dunnett's multiple comparison *post hoc* test. (B) Edu cell proliferation assay of SW-CC made using different EC/SMC ratios. EC and SMC were plated at ratios 1:1 and 1.5:1, and Edu cell proliferation assay was performed. Proliferating cells appeared *white*, SMC stained for  $\alpha$ -smooth muscle actin were *red*, and EC stained for VE-cadherin were *green* revealing no significant proliferative or morphological differences between groups. Scale bar = 50  $\mu$ m. ANOVA, analysis of variance; EC, endothelial cells; SMC, smooth muscle cells; SW-CC, sandwich coculture; VE, vascular endothelial.
