# Supplementary material for: Three-Dimensional Coculture Model to Analyze the Cross Talk Between Endothelial and Smooth Muscle Cells
Source: PubMed Central journal article supplement — Tissue Eng Part C Methods. 2017 Jan 1;23(1):38–49. doi: 10.1089/ten.tec.2016.0299 (PMC5240006; doi:10.1089/ten.tec.2016.0299), 2017-01-01
Supplement: Supp_Fig3.pdf [file Supp_Fig3.pdf]

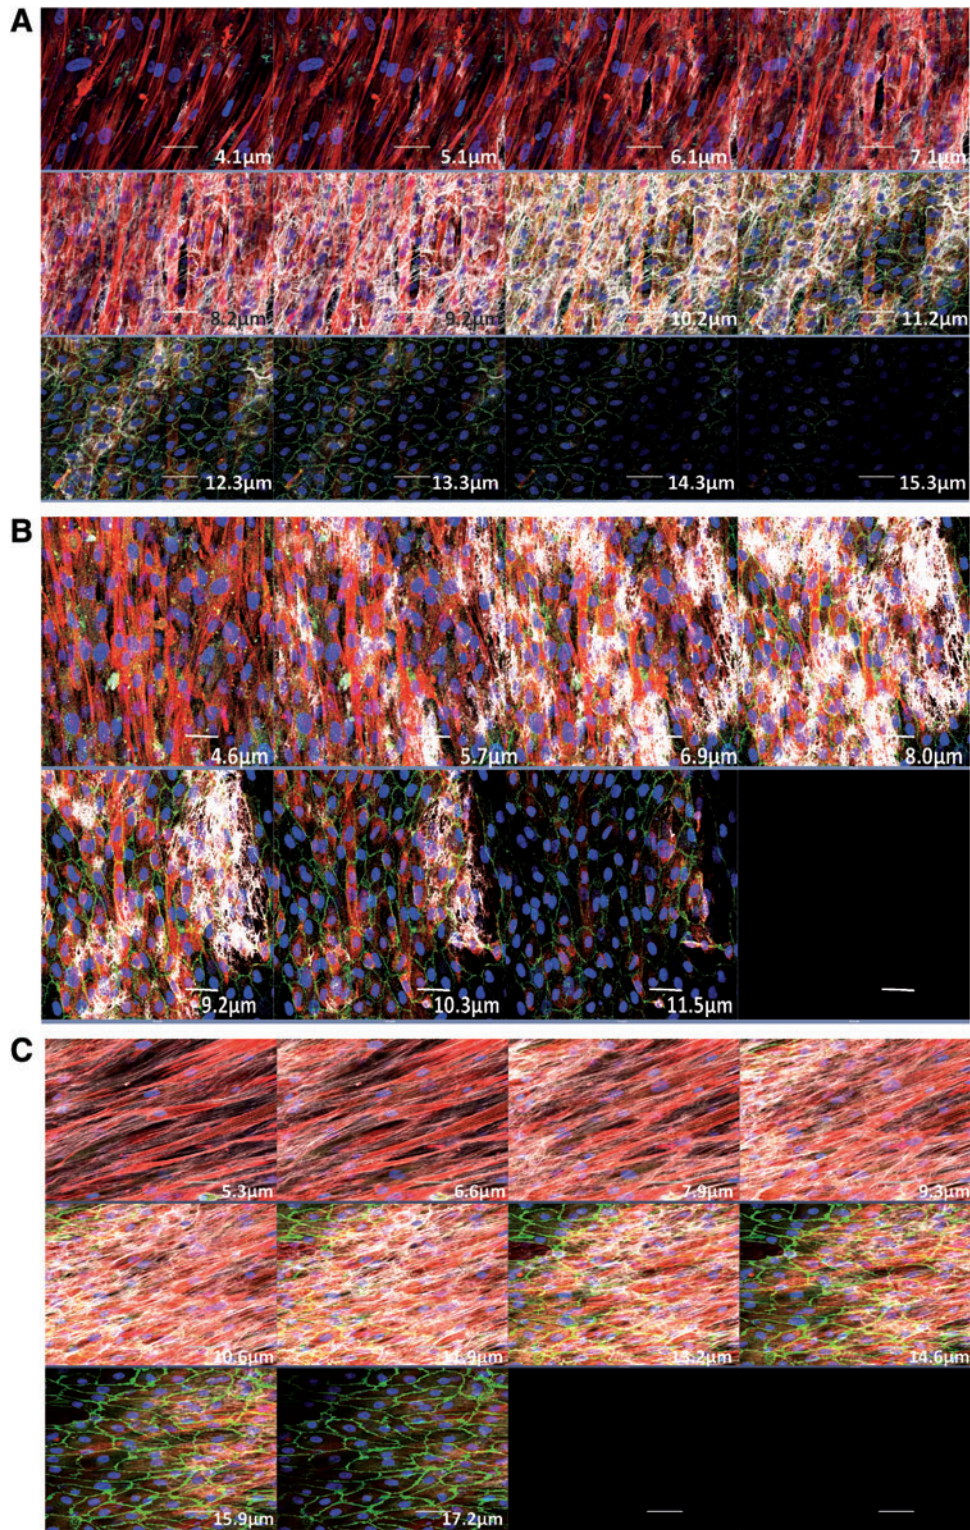

**SUPPLEMENTARY FIG. S3.** (A) Vascular basement membrane deposition of the 3D SW-CC on day 7 collagen IV. Z stack gallery of the 3D SW-CC (Fig. 4A) imaged on day 7. The 3D SW-CC was fixed and stained for  $\alpha$ -smooth muscle actin (*red*) for SMC, VE-cadherin (*green*) for EC, and DAPI (*blue*) for nuclei and for collagen IV (*white*). Scale bar = 50  $\mu$ m. (B) Vascular basement membrane deposition of the 3D SW-CC on day 7—laminin. Z stack gallery of the 3D SW-CC (Fig. 4B) imaged on day 7. The 3D SW-CC was fixed and stained for  $\alpha$ -smooth muscle actin (*red*) for SMC, VE-cadherin (*green*) for EC, and DAPI (*blue*) for nuclei and for laminin (*white*). Scale bar = 50  $\mu$ m. (C) Vascular basement membrane deposition of the 3D SW-CC on day 7—perlecan. Z stack gallery of the 3D SW-CC (Fig. 4C) imaged on day 7. The 3D SW-CC was fixed and stained for  $\alpha$ -smooth muscle actin (*red*) for SMC, VE-cadherin (*green*) for EC, and DAPI (*blue*) for nuclei and for perlecan (*white*). Scale bar = 50  $\mu$ m.
